# Supplementary material
Source: publisher site journal article supplement (https://www.spandidos-publications.com/3408/downloadSupplementary)
Supplement: Supplementary file 1 [file downloadSupplementary]

## Sheet: Table S6
Table SVI. Top 128 upregulated mRNAs in GSE19188 (filtration citeria, P-value <0.05 and LogFC ≥2) .
ID	adj.P.Val	P-Value	t	B	logFC	Gene.symbol	Gene.title
223229_at	8.43e-29	1.4e-31	15.6337	61.2586	2.8	UBE2T	ubiquitin conjugating enzyme E2 T
204641_at	9.22e-26	3.79e-28	14.1973	53.4425	2.88	NEK2	NIMA related kinase 2
201291_s_at	2.21e-25	9.85e-28	14.0263	52.4985	3.89	TOP2A	topoisomerase (DNA) II alpha
225655_at	4.66e-25	2.23e-27	13.8799	51.6878	2.59	UHRF1	ubiquitin like with PHD and ring finger domains 1
218355_at	6.66e-25	3.31e-27	13.8096	51.2984	2.67	KIF4A	kinesin family member 4A
202954_at	1.48e-24	7.82e-27	13.6564	50.4476	2.95	UBE2C	ubiquitin conjugating enzyme E2 C
218726_at	2.42e-24	1.35e-26	13.5599	49.9104	2.2	HJURP	Holliday junction recognition protein
37892_at	2.43e-24	1.35e-26	13.5589	49.9052	4.24	COL11A1	collagen type XI alpha 1 chain
201292_at	3.06e-24	1.75e-26	13.513	49.6494	3.42	TOP2A	topoisomerase (DNA) II alpha
221521_s_at	3.42e-24	1.98e-26	13.4917	49.5306	2.23	GINS2	GINS complex subunit 2
210052_s_at	3.65e-24	2.16e-26	13.4762	49.4444	3.04	TPX2	TPX2, microtubule nucleation factor
202870_s_at	9.45e-24	6.09e-26	13.292	48.4163	3.02	CDC20	cell division cycle 20
209408_at	1.6e-23	1.1e-25	13.1878	47.8342	2.48	KIF2C	kinesin family member 2C
214710_s_at	2.05e-23	1.47e-25	13.1358	47.5432	2.85	CCNB1	cyclin B1
202705_at	2.26e-23	1.63e-25	13.1173	47.4394	2.67	CCNB2	cyclin B2
207828_s_at	2.59e-23	1.92e-25	13.0886	47.2787	2.71	CENPF	centromere protein F
222608_s_at	2.6e-23	1.94e-25	13.087	47.2696	3.25	ANLN	anillin actin binding protein
206102_at	3.3e-23	2.53e-25	13.0401	47.0072	2.86	GINS1	GINS complex subunit 1
203744_at	3.92e-23	3.03e-25	13.0081	46.8275	2.63	HMGB3	high mobility group box 3
209875_s_at	5.76e-23	4.7e-25	12.9308	46.3942	3.8	SPP1	secreted phosphoprotein 1
204320_at	6.19e-23	5.11e-25	12.9162	46.3122	3.78	COL11A1	collagen type XI alpha 1 chain
223381_at	8.46e-23	7.2e-25	12.8555	45.9713	2.81	NUF2	NUF2, NDC80 kinetochore complex component
204675_at	1.04e-22	9.02e-25	12.8158	45.7484	2.06	SRD5A1	steroid 5 alpha-reductase 1
203764_at	1.31e-22	1.17e-24	12.7693	45.4872	3.05	DLGAP5	DLG associated protein 5
204825_at	1.32e-22	1.18e-24	12.7683	45.4813	2.65	MELK	maternal embryonic leucine zipper kinase
203362_s_at	1.47e-22	1.33e-24	12.7471	45.3622	2.68	MAD2L1	MAD2 mitotic arrest deficient-like 1 (yeast)
218009_s_at	1.65e-22	1.52e-24	12.7244	45.2347	2.44	PRC1	protein regulator of cytokinesis 1
1555758_a_at	1.75e-22	1.62e-24	12.7129	45.1701	2.65	CDKN3	cyclin dependent kinase inhibitor 3
204092_s_at	1.93e-22	1.8e-24	12.6941	45.0643	2.13	AURKA	aurora kinase A
202503_s_at	2.13e-22	1.99e-24	12.6768	44.9667	2.72	KIAA0101	KIAA0101
202095_s_at	3.19e-22	3.09e-24	12.5994	44.5312	2.72	BIRC5	baculoviral IAP repeat containing 5
209714_s_at	3.46e-22	3.4e-24	12.5821	44.4339	2.52	CDKN3	cyclin dependent kinase inhibitor 3
204962_s_at	7.68e-22	8.06e-24	12.4306	43.5804	2.58	SLC35F6///CENPA	solute carrier family 35 member F6///centromere protein A
206364_at	8.84e-22	9.43e-24	12.4031	43.4255	2.3	KIF14	kinesin family member 14
203755_at	9.85e-22	1.07e-23	12.3815	43.3036	2.61	BUB1B	BUB1 mitotic checkpoint serine/threonine kinase B
218469_at	1.04e-21	1.14e-23	12.3706	43.242	3.73	GREM1	gremlin 1, DAN family BMP antagonist
222036_s_at	1.18e-21	1.3e-23	12.3463	43.1048	2.04	MCM4	minichromosome maintenance complex component 4
212022_s_at	1.2e-21	1.33e-23	12.3434	43.0882	2.15	MKI67	marker of proliferation Ki-67
218542_at	1.32e-21	1.48e-23	12.3245	42.982	2.47	CEP55	centrosomal protein 55
208079_s_at	1.62e-21	1.83e-23	12.2869	42.7698	2.32	AURKA	aurora kinase A
228729_at	1.93e-21	2.24e-23	12.2514	42.5689	2.37	CCNB1	cyclin B1
222958_s_at	2.04e-21	2.38e-23	12.241	42.5102	2.41	DEPDC1	DEP domain containing 1
219918_s_at	2.43e-21	2.87e-23	12.2082	42.325	2.93	ASPM	abnormal spindle microtubule assembly
218662_s_at	2.52e-21	2.99e-23	12.201	42.2845	2.14	NCAPG	non-SMC condensin I complex subunit G
218782_s_at	3.04e-21	3.63e-23	12.1667	42.0906	2.18	ATAD2	ATPase family, AAA domain containing 2
223307_at	3.72e-21	4.53e-23	12.1278	41.8713	2.17	CDCA3	cell division cycle associated 3
201250_s_at	3.9e-21	4.79e-23	12.118	41.8158	2.14	SLC2A1	solute carrier family 2 member 1
209035_at	3.98e-21	4.9e-23	12.1142	41.7939	2.15	MDK	midkine (neurite growth-promoting factor 2)
212021_s_at	4.86e-21	6.08e-23	12.0765	41.5813	2.03	MKI67	marker of proliferation Ki-67
219978_s_at	5.33e-21	6.71e-23	12.0591	41.4828	2.38	NUSAP1	nucleolar and spindle associated protein 1
204026_s_at	5.41e-21	6.84e-23	12.0557	41.4637	2.21	ZWINT	ZW10 interacting kinetochore protein
229490_s_at	5.62e-21	7.12e-23	12.0488	41.4243	2.35
218468_s_at	6.49e-21	8.35e-23	12.0208	41.2662	3.53	GREM1	gremlin 1, DAN family BMP antagonist
225681_at	7.41e-21	9.67e-23	11.9951	41.1209	3.19	CTHRC1	collagen triple helix repeat containing 1
207165_at	1.04e-20	1.39e-22	11.9313	40.7601	2.39	HMMR	hyaluronan mediated motility receptor
203418_at	1.18e-20	1.6e-22	11.9067	40.6209	2.22	CCNA2	cyclin A2
223062_s_at	2.13e-20	3.12e-22	11.7902	39.9614	2.77	PSAT1	phosphoserine aminotransferase 1
204822_at	2.34e-20	3.47e-22	11.7719	39.858	2.9	TTK	TTK protein kinase
218039_at	2.66e-20	3.98e-22	11.7476	39.7205	2.41	NUSAP1	nucleolar and spindle associated protein 1
204444_at	2.67e-20	4e-22	11.7469	39.7165	2.18	KIF11	kinesin family member 11
224428_s_at	3.09e-20	4.73e-22	11.7175	39.5501	2.69	CDCA7	cell division cycle associated 7
210559_s_at	3.71e-20	5.74e-22	11.6837	39.3587	2.33	CDK1	cyclin dependent kinase 1
219306_at	4.01e-20	6.3e-22	11.6673	39.2658	2.05	KIF15	kinesin family member 15
222740_at	4.71e-20	7.49e-22	11.6371	39.0945	2.05	ATAD2	ATPase family, AAA domain containing 2
216548_x_at	4.81e-20	7.68e-22	11.6329	39.0708	2.03	HMGB3P1	high mobility group box 3 pseudogene 1
218663_at	5.2e-20	8.36e-22	11.6179	38.9858	2.01	NCAPG	non-SMC condensin I complex subunit G
203214_x_at	5.36e-20	8.68e-22	11.6114	38.9493	2.07	CDK1	cyclin dependent kinase 1
218755_at	9.72e-20	1.66e-21	11.4985	38.3096	2.17	KIF20A	kinesin family member 20A
202580_x_at	1.09e-19	1.88e-21	11.4768	38.1868	2.26	FOXM1	forkhead box M1
219148_at	1.16e-19	2.01e-21	11.4649	38.119	2.85	PBK	PDZ binding kinase
201890_at	1.27e-19	2.23e-21	11.4466	38.0157	2.77	RRM2	ribonucleotide reductase regulatory subunit M2
213007_at	1.34e-19	2.37e-21	11.4356	37.9535	2.01	FANCI	Fanconi anemia complementation group I
219787_s_at	1.51e-19	2.72e-21	11.4118	37.8185	2.07	ECT2	epithelial cell transforming 2
209642_at	1.64e-19	2.97e-21	11.3963	37.7303	2.48	BUB1	BUB1 mitotic checkpoint serine/threonine kinase
219990_at	1.7e-19	3.12e-21	11.388	37.6837	2	E2F8	E2F transcription factor 8
209773_s_at	2.52e-19	4.76e-21	11.314	37.264	2.95	RRM2	ribonucleotide reductase regulatory subunit M2
204033_at	3.97e-19	7.8e-21	11.2278	36.7758	2.28	TRIP13	thyroid hormone receptor interactor 13
205394_at	5.97e-19	1.2e-20	11.1523	36.3479	2.07	CHEK1	checkpoint kinase 1
200606_at	6.42e-19	1.32e-20	11.1365	36.2584	2.39	DSP	desmoplakin
202589_at	1.16e-18	2.49e-20	11.0249	35.6257	2.27	TYMS	thymidylate synthetase
204580_at	1.32e-18	2.89e-20	10.9988	35.4781	4.07	MMP12	matrix metallopeptidase 12
1554768_a_at	1.92e-18	4.29e-20	10.9303	35.0898	2.31	MAD2L1	MAD2 mitotic arrest deficient-like 1 (yeast)
203819_s_at	2.3e-18	5.23e-20	10.8955	34.8926	2.81	IGF2BP3	insulin like growth factor 2 mRNA binding protein 3
204162_at	3.19e-18	7.46e-20	10.8335	34.5417	2.35	NDC80	NDC80, kinetochore complex component
1552619_a_at	3.87e-18	9.29e-20	10.7952	34.3246	2.21	ANLN	anillin actin binding protein
212344_at	4.63e-18	1.13e-19	10.7607	34.1294	2.05	SULF1	sulfatase 1
242881_x_at	1.02e-17	2.66e-19	10.6113	33.284	2.71	DUXAP10	double homeobox A pseudogene 10
205941_s_at	2.54e-17	7.15e-19	10.4382	32.3054	2.1	COL10A1	collagen type X alpha 1 chain
227452_at	2.68e-17	7.59e-19	10.4278	32.2464	2.08	LINC00673///LINC00511	long intergenic non-protein coding RNA 673///long intergenic non-protein coding RNA 511
203889_at	2.79e-17	7.93e-19	10.4201	32.203	2.95	SCG5	secretogranin V
217428_s_at	3.9e-17	1.14e-18	10.3566	31.8443	2.65	COL10A1	collagen type X alpha 1 chain
225834_at	8.14e-17	2.51e-18	10.2181	31.0624	2.11	FAM72A///FAM72D///FAM72B///FAM72C	family with sequence similarity 72 member A///family with sequence similarity 72 member D///family with sequence similarity 72 member B///family with sequence similarity 72 member C
238617_at	1.28e-16	4.05e-18	10.1342	30.5899	2.03	KIF26B	kinesin family member 26B
212353_at	2.69e-16	8.96e-18	9.99482	29.8047	2.23	SULF1	sulfatase 1
228273_at	4.43e-16	1.54e-17	9.89997	29.2713	2.14	PRR11	proline rich 11
208650_s_at	5.36e-16	1.88e-17	9.86422	29.0704	2.12	CD24	CD24 molecule
204348_s_at	5.86e-16	2.09e-17	9.84593	28.9677	2.06	LOC100507855///AK4	adenylate kinase 4, mitochondrial-like///adenylate kinase 4
203820_s_at	1.46e-15	5.58e-17	9.67283	27.9967	2.5	IGF2BP3	insulin like growth factor 2 mRNA binding protein 3
225601_at	3.51e-15	1.44e-16	9.50584	27.0626	2.2	HMGB3	high mobility group box 3
202311_s_at	5.43e-15	2.3e-16	9.42238	26.5967	2.45	COL1A1	collagen type I alpha 1 chain
235456_at	1.1e-14	4.91e-16	9.28802	25.8482	2.08
223721_s_at	1.56e-14	7.21e-16	9.21973	25.4686	2.38	DNAJC12	DnaJ heat shock protein family (Hsp40) member C12
202310_s_at	2.13e-14	1.02e-15	9.15847	25.1285	2.23	COL1A1	collagen type I alpha 1 chain
218976_at	5.44e-14	2.78e-15	8.97934	24.137	2.61	DNAJC12	DnaJ heat shock protein family (Hsp40) member C12
205229_s_at	8.92e-14	4.75e-15	8.88335	23.6073	2.13	COCH	cochlin
201387_s_at	2.74e-13	1.58e-14	8.66687	22.4181	2.55	UCHL1	ubiquitin C-terminal hydrolase L1
206023_at	4.67e-13	2.8e-14	8.56384	21.8547	2.36	NMU	neuromedin U
223278_at	6.4e-13	3.93e-14	8.5026	21.5207	2.18	GJB2	gap junction protein beta 2
214023_x_at	5.02e-12	3.6e-13	8.09924	19.3382	2.52	TUBB2B	tubulin beta 2B class IIb
242517_at	6.23e-12	4.55e-13	8.05623	19.1075	2.13	KISS1R	KISS1 receptor
205242_at	2.24e-11	1.79e-12	7.80333	17.7589	3.18	CXCL13	C-X-C motif chemokine ligand 13
205549_at	6.12e-11	5.31e-12	7.60054	16.6886	2.59	PCP4	Purkinje cell protein 4
230030_at	7.27e-11	6.38e-12	7.56604	16.5075	2.17	HS6ST2	heparan sulfate 6-O-sulfotransferase 2
220393_at	8.11e-11	7.16e-12	7.54441	16.3942	2.01	LGSN	lengsin, lens protein with glutamine synthetase domain
1552767_a_at	2.31e-10	2.21e-11	7.33188	15.2873	2.3	HS6ST2	heparan sulfate 6-O-sulfotransferase 2
204475_at	6.23e-10	6.41e-11	7.12858	14.2406	2.81	MMP1	matrix metallopeptidase 1
227174_at	6.8e-10	7.04e-11	7.11053	14.1482	2.28	WDR72	WD repeat domain 72
206134_at	1.04e-09	1.11e-10	7.02242	13.699	2.32	ADAMDEC1	ADAM like decysin 1
216623_x_at	2.21e-09	2.5e-10	6.86566	12.9061	2.1	TOX3	TOX high mobility group box family member 3
214774_x_at	2.57e-09	2.94e-10	6.83355	12.7446	2.09	TOX3	TOX high mobility group box family member 3
226086_at	3.25e-09	3.78e-10	6.78455	12.4989	2.05	SYT13	synaptotagmin 13
202831_at	8.04e-09	9.95e-10	6.59385	11.551	2.23	GPX2	glutathione peroxidase 2
209942_x_at	1.83e-08	2.41e-09	6.41713	10.6845	2.64	MAGEA6///MAGEA3	MAGE family member A6///MAGE family member A3
214612_x_at	2.55e-08	3.44e-09	6.34529	10.3356	2.57	MAGEA6	MAGE family member A6
206239_s_at	3.07e-07	5.06e-08	5.79022	7.71312	2.46	SPINK1	serine peptidase inhibitor, Kazal type 1
206561_s_at	5.3e-07	9.13e-08	5.66457	7.13859	2.04	AKR1B10	aldo-keto reductase family 1 member B10
204988_at	1.47e-06	2.77e-07	5.42427	6.06123	2.2	FGB	fibrinogen beta chain
209988_s_at	7.9e-06	1.72e-06	5.01402	4.291	2.22	ASCL1	achaete-scute family bHLH transcription factor 1
